# Supplementary material for: Antimicrobial Biophotonic Treatment of Ampicillin-Resistant Pseudomonas aeruginosa with Hypericin and Ampicillin Cotreatment Followed by Orange Light
Source: Pharmaceutics. 2019 Dec 1;11(12):641. doi: 10.3390/pharmaceutics11120641 (PMC6956302; doi:10.3390/pharmaceutics11120641)
Supplement: Supplementary file 1 [file pharmaceutics-11-00641-s001.pdf]

# Supplementary Materials: Antimicrobial Biophotonic Treatment of Ampicillin-Resistant *Pseudomonas aeruginosa* with Hypericin and Ampicillin Cotreatment Followed by Orange Light

Seemi Tasnim Alam, Tram Anh Ngoc Le, Jin-Soo Park, Hak Cheol Kwon and Kyungsu Kang

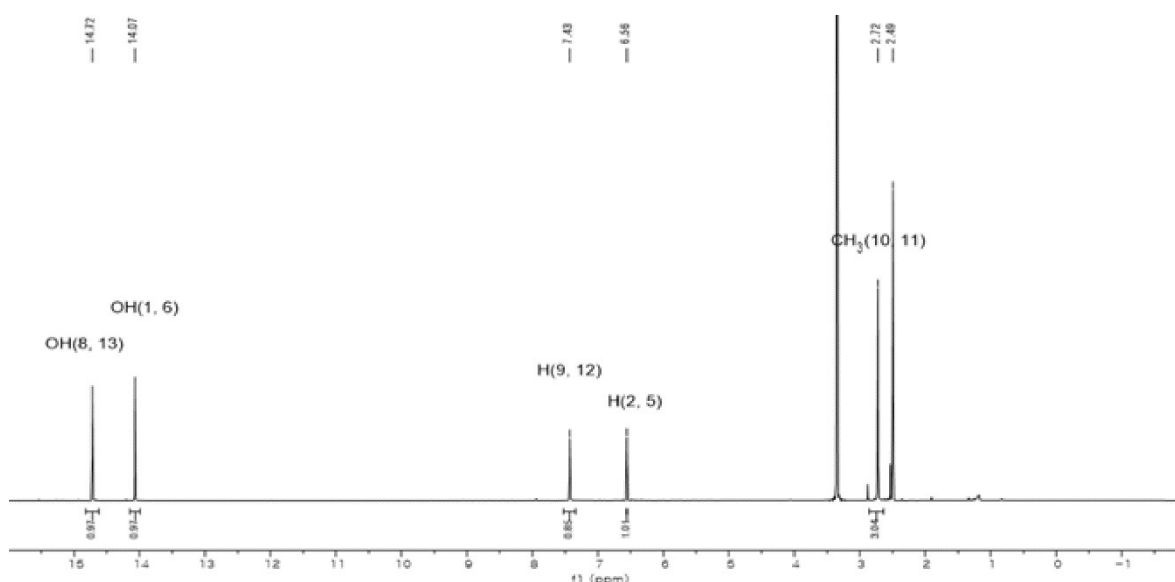

**Figure S1.**  $^1\text{H}$ -NMR spectrum of hypericin used in this study (in  $\text{DMSO}-d_6$ ).

$^1\text{H}$  NMR (500 MHz,  $\text{DMSO}-d_6$ )  $\delta$  14.72 (s, 1H), 14.07 (s, 1H), 7.43 (s, 1H), 6.56 (d,  $J = 1.0$  Hz, 1H), 2.72 (s, 3H).

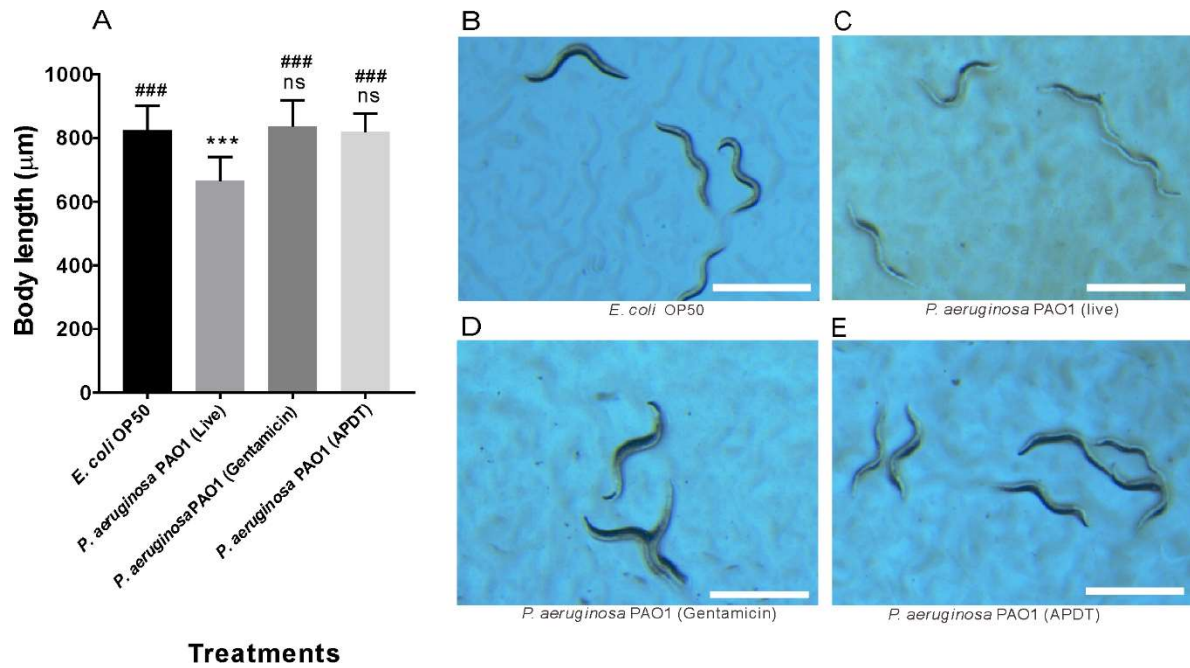

**Figure S2.** Pathogenesis assessment for *P. aeruginosa* PAO1 in *C. elegans* by measurement of worm growth at 64 h. Body length measurement graph (A). Age-synchronized *C. elegans* eggs were treated with the control, *E. coli* OP50 (B), live *P. aeruginosa* PAO1 (C), gentamicin (100 μg/mL)-treated *P. aeruginosa* (D), or APDT-treated *P. aeruginosa* (E) for 64 h. Scale bar = 1 mm. Each value corresponds to the mean ± standard deviation ( $n = 30$ ).

\*\*\*  $p < 0.001$ , difference from the vehicle control.

###  $p < 0.001$ , difference from the live *P. aeruginosa* treatment group.

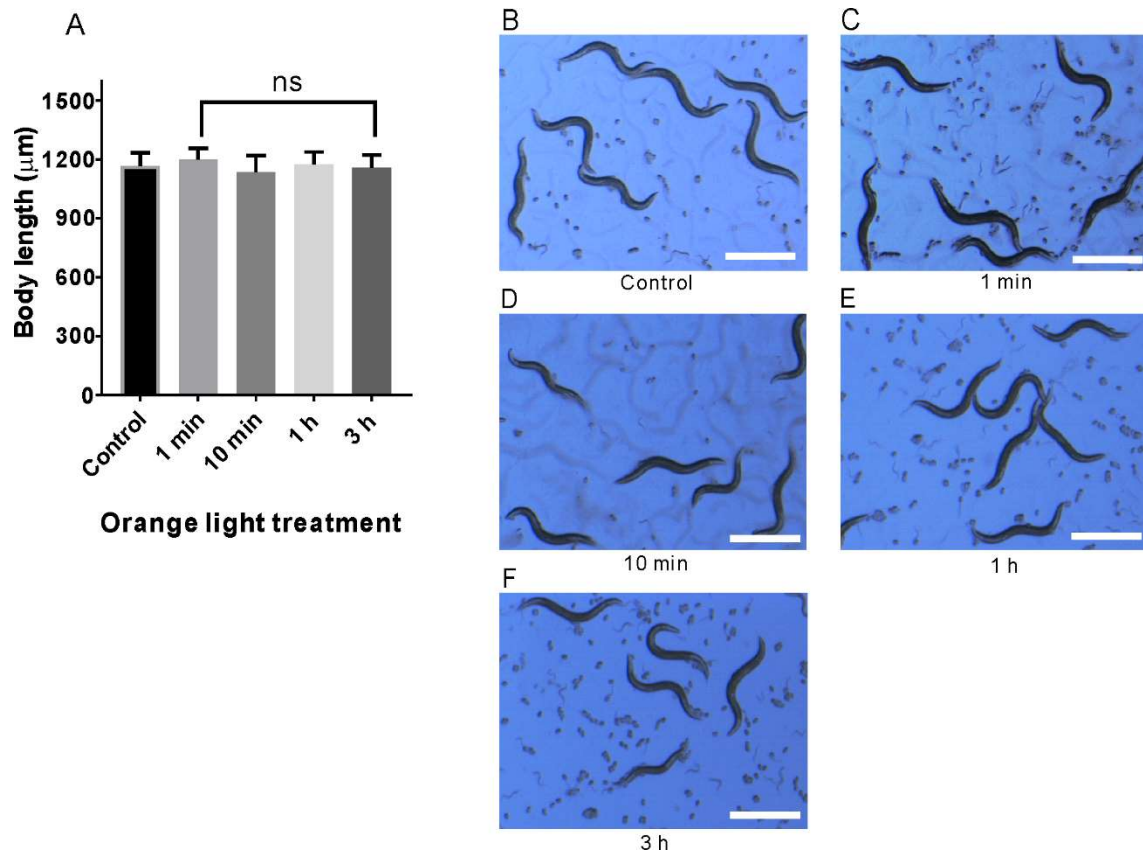

**Figure S3.** Toxicity test of orange light exposure in *C. elegans* fed *E. coli* OP50. Age-synchronized L1-stage worms were treated with orange light ( $150 \pm 20 \text{ W/m}^2$ ) for 1 min, 10 min, 1 h, and 3 h. Then, the body length of worms was measured at 96 h after the egg preparation. The graph is representative of two independent experiments. Scale bar = 1 mm. No significant difference (ns) observed compared with the vehicle control ( $n = 50$ ).
